# Supplementary material for: YY1 Regulates Melanocyte Development and Function by Cooperating with MITF
Source: PubMed Central journal article supplement (PMC3342948; doi:10.1371/journal.pgen.1002688), 2012-05-03
Supplement: pgen.1002688.s001.pdf [file pgen.1002688.s001.pdf]

Figure S1

A

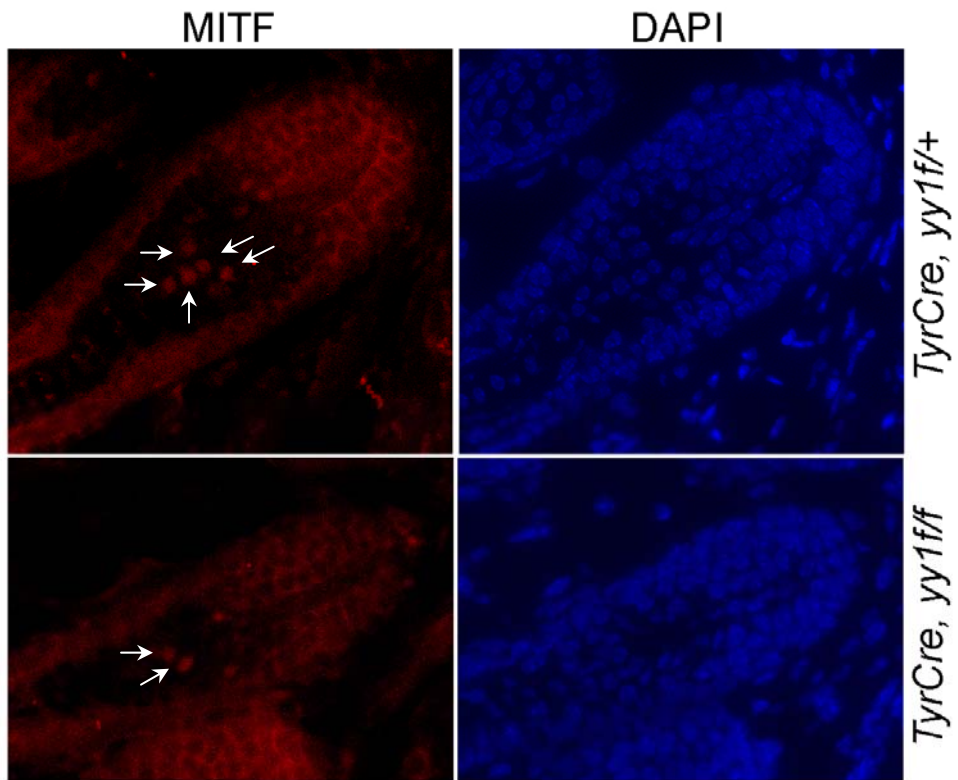

B

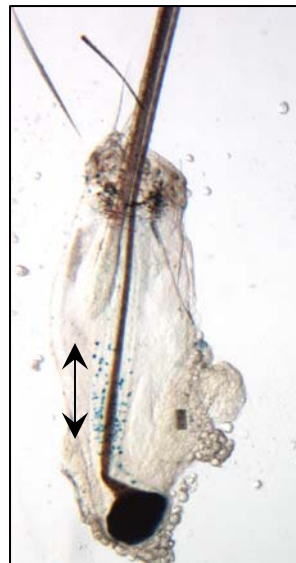

*TyrCre, yy1f/+*,  
*Dct-LacZ*

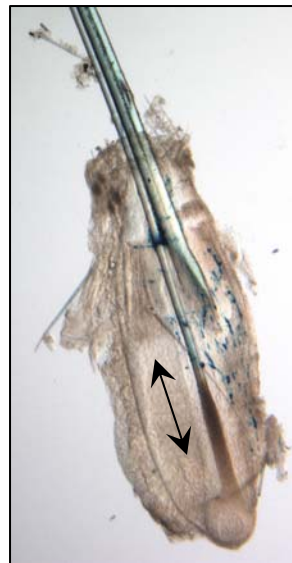

*TyrCre, yy1f/f*,  
*Dct-LacZ*
