# Supplementary material for: YY1 Regulates Melanocyte Development and Function by Cooperating with MITF
Source: PubMed Central journal article supplement (PMC3342948; doi:10.1371/journal.pgen.1002688), 2012-05-03

Figure S2

A

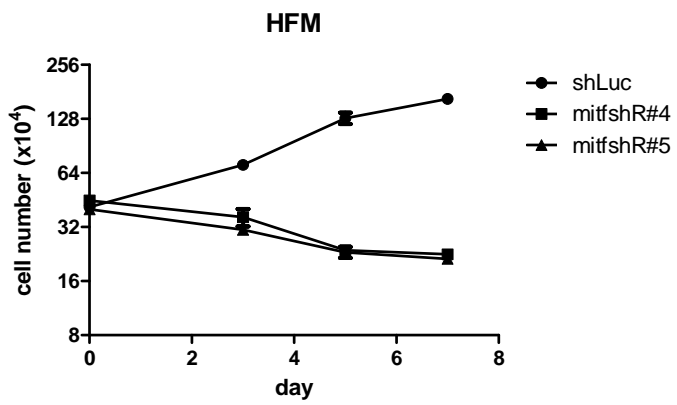

C

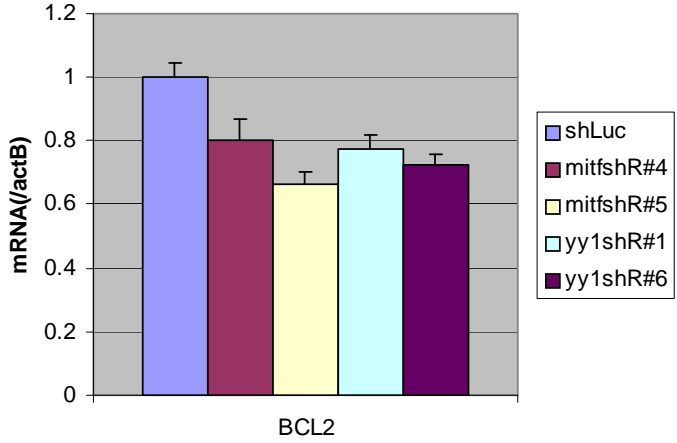

B

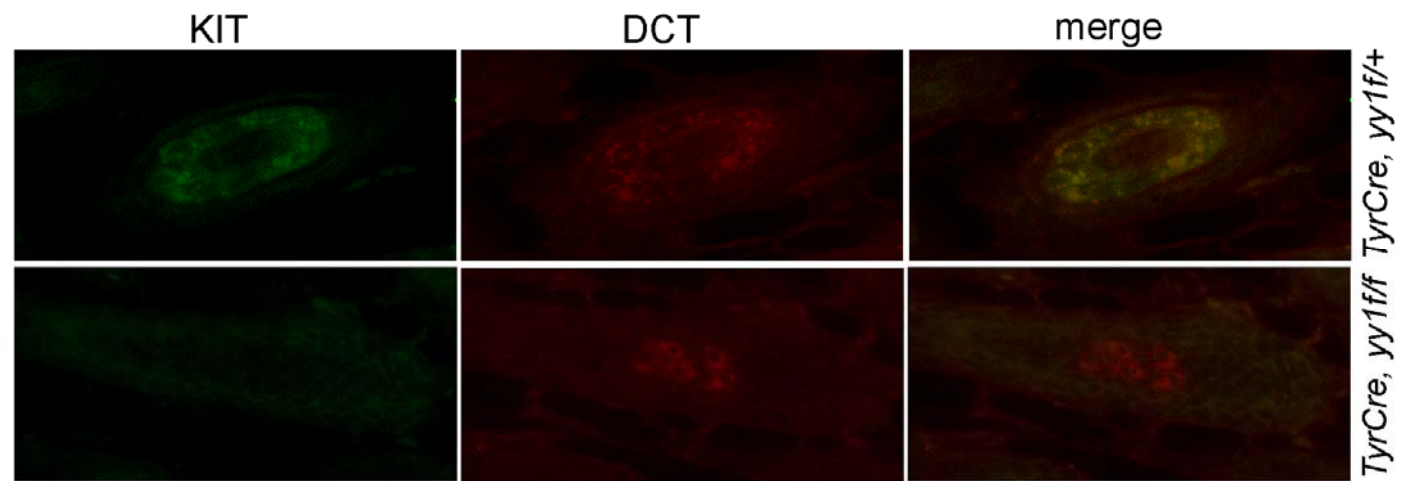

Supplement: pgen.1002688.s002.pdf [file pgen.1002688.s002.pdf]
