# Supplementary material for: YY1 Regulates Melanocyte Development and Function by Cooperating with MITF
Source: PLoS Genet. 2012 May 3;8(5):e1002688. doi: 10.1371/journal.pgen.1002688 (PMC3342948; doi:10.1371/journal.pgen.1002688)
Supplement: Table S2 — Enriched motifs in the promoters of genes that respond to MITF shRNA. The TF names show either TF.TRANSFAC_Matrix_ID or JASPAR matrix names. (XLS) [file pgen.1002688.s007.xls]

## Sheet: Table_S2_EnrichedMotifs
Table S2. Enriched motifs in the promoters of genes that respond to MITF shRNA. The TF names show either TF.TRANSFAC_Matrix_ID or JASPAR matrix names.
TF	Length: Consensus_Motif	Fold-change relative to random sequences	Binomial test p-value
ZF5.M00333	13: NRNGNGCGCGCWN	117.39	7.83e-34
Pax-4.M00373	21: NGNVGTCANGCGTGNNSNNYN	83.8503	5.18e-24
E2F-1.M00938	16: TTGGCGCGRAANNGNM	61.3155	6.96e-34
Elk-1.M00025	14: NNNNCCGGAARTNN	56.599	4.4e-16
YY1.M01035	11: NYNKCCATNTT	54.5027	1.78e-15
Stra13.M00985	14: NYSTCACGTGABNN	52.4064	7.19e-15
Arnt.M00539	20: NNNNNRTCACGTGAYNNNNN	49.2621	6.58e-27
Sp1.M00008	10: GGGGCGGGGT	43.3544	6.94e-124
Adf-1.M00171	16: CCGCYGCYGYNGCCGV	39.0566	1.67e-189
E2F-4DP-2.M00739	8: TTTCSCGC	36.1604	2.2e-19
E2F-1DP-1.M00736	8: TTTCSCGC	36.1604	2.2e-19
c-MycMax.M00322	10: GCCAYGYGSN	35.6364	4.37e-19
AHRHIF.M00976	9: NRCGTGNGN	34.9376	1.78e-27
Sp-1.M00931	10: GGGGCGGGGC	34.0918	1.39e-162
Sp-1.M00932	13: NNGGGGCGGGGNN	32.1306	3.64e-231
E2F-1DP-2.M00737	8: TTTSSCGC	31.0945	3.38e-24
AP-2.M00189	12: MKCCCSCNGGCG	30.3957	4.44e-31
Sp1.M00196	13: NGGGGGCGGGGYN	29.9299	4.03e-264
AP-2gamma.M00470	9: GCCYNNGGS	29.8717	8.28e-16
ETF.M00695	7: GVGGMGG	27.3943	5.87e-291
ZF5.M00716	8: GSGCGCGR	26.9622	8.31e-189
NF-Y.M00287	16: NNNRRCCAATSRGNNN	25.5045	1.83e-19
Sp-1.M00933	10: CCCCGCCCCN	22.6613	6.79e-154
NF-Y	16: CTCAGCCAATCAGCGC	22.43	2.38e-27
AP2alpha	9: GCCCGGGGG	22.134	2.31e-88
AP-2alpha.M00469	9: GCCNNNRGS	22.134	2.31e-88
E2F-1.M00431	8: TTTSGCGS	21.836	1.41e-31
E2F.M00919	11: NCSCGCSAAAN	21.4866	4.49e-21
Bsap	20: RGAGCACTGAAGCGTARCSG	21.1373	2.06e-30
KROX.M00982	14: CCCGCCCCCRCCCC	20.877	1.3e-234
E2F.M00803	6: GGCGSG	20.642	0
c-Ets-1(p54).M00032	10: NCMGGAWGYN	19.5651	1.68e-14
CREB.M00178	12: NSTGACGTMANN	18.8663	6.35e-14
E2F.M00050	8: TTTSGCGC	18.6916	2.32e-26
E2F	8: TTTGGCGC	18.6916	2.32e-26
Hairy.M00067	14: NNGGCACGCGMCNN	18.4714	0
E2F.M00427	8: TTTSGCGS	18.1676	2.39e-13
CREB	12: CCTGGTGACGTC	18.0802	2.59e-17
AP-2.M00915	13: SNNNCCNCAGGCN	17.364	2.62e-115
AP-2alphaA.M01047	15: ANMGCCTNAGGCKNT	17.2941	1.88e-16
E2F.M00920	12: NKCGCGCSAAAN	17.0976	4.72e-61
E2F-4DP-1.M00738	8: TTTSGCGC	16.4207	1.23e-22
E2F-1.M00940	10: NTTTCGCGCS	16.3209	5.26e-26
HIF-1.M00466	12: NGTACGTGCNGB	16.246	2.61e-15
E2F-1.M00428	8: NKTSSCGC	15.6668	7.71e-65
CREB.M00113	12: NNGNTGACGTNN	15.4599	1.15e-27
AP-2.M00800	16: GSCCSCRGGCNRNRNN	15.2136	0
E2F.M00516	12: TTTSGCGCGMNR	14.4991	1.61e-19
NRF-2	10: ACCGGAAGAG	14.2808	3.97e-25
c-MycMax.M00615	20: NNNNNNNCACGTGNNNNNNN	14.1497	7.59e-25
E2F.M00918	9: TTTSGCGSG	13.2689	7.83e-128
SP1	10: GGGGCGGGGT	12.6327	2.04e-49
USF.M00121	14: NNRYCACGTGRYNN	12.5775	1.69e-21
MafB	8: GCTGACGS	12.5775	1.91e-16
CREB.M00177	12: NSTGACGTAANN	12.2282	6.84e-16
Elk-1	10: GAGCCGGAAG	12.1845	1.14e-20
E2F-1.M00939	9: TTTSGCGSG	12.0843	1.32e-122
Churchill.M00986	6: CGGGNN	11.3231	2.34e-277
USF.M00122	14: NNRNCACGTGNYNN	11.18	3.05e-14
MAZR.M00491	13: NSGGGGGGGGMCN	10.4813	1.07e-40
CREB.M00916	14: NNTKACGTCANNNS	10.4813	7.47e-33
Arnt.M00236	16: NDDNNCACGTGNNNNN	10.1319	1.3e-12
GABP.M00341	12: VCCGGAAGNGCR	10.0882	2.66e-16
RbE2F-1DP-1.M00740	8: TTTSGCGC	10.0497	6.27e-33
CREB.M00917	11: CNNTGACGTMA	9.95723	4.94e-16
AP-2alphaA.M01045	15: ANNGCCTNAGGSNNT	9.83629	3.8e-48
ATF.M00017	14: CNSTGACGTNNNYC	9.73263	8.69e-14
MAZ.M00649	8: GGGGAGGG	9.4983	1.06e-302
USF.M00187	10: GYCACGTGNC	8.96733	1.32e-15
E74A	7: CCGGAAG	8.85087	3.36e-43
CREBATF.M00981	9: NTGACGTNA	8.83423	3.43e-12
SAP-1	9: ACCGGAAGT	8.82175	6.41e-20
HIF-1.M00797	14: GNNKACGTGCGGNN	8.73441	1.77e-10
Pax-2	8: AGTCACGS	8.09156	2.19e-35
MTF-1.M00650	14: TBTGCACHCGGCCC	7.72995	1.5e-11
E2F.M00426	8: TTTSGCGS	7.65134	6.4e-14
MZF1.M00084	13: KNNNKAGGGGNAA	7.3369	5.72e-12
NF-Y.M00775	13: NNNNRRCCAATSR	6.98753	3.3e-11
STAT3.M00497	8: NNNTTCCN	6.94171	5.65e-67
AhR.M00778	11: NTNGCGTGNNN	6.79867	5.22e-40
v-Myb.M00227	9: NSYAACGGH	6.55081	2.99e-13
GATA-2.M00076	10: NNNGATRNNN	6.44599	1.18e-20
MZF_5-13	10: GKAGGGGGAA	6.42852	8.71e-16
Pax-3.M00327	21: NNNNNNCGTCACGSTYNNNNN	6.22712	6.7e-17
E2.M00181	16: NNACCRNNANCGGTRN	6.11409	5.09e-12
CFI-USP	10: GGGGTCACGG	6.09225	1.74e-15
c-ETS	6: YTTCCG	6.04469	5.04e-127
CREB.M00801	6: CGTCAN	5.85719	6.75e-85
Ahr-ARNT	6: TGCGTG	5.796	4.39e-109
CP2LBP-1cLSF.M00947	15: GCTGGNTNGNNCYNG	5.78412	3.25e-23
Spz1.M00446	15: DNNGGRGGGWWNNNN	5.77708	0
N-Myc.M00055	12: NNCCACGTGNNN	5.76471	1.15e-12
AhRArnt.M00235	16: KNNKNNTYGCGTGCMS	5.76471	1.99e-09
E74A.M00016	17: NNAAYCCGGAAGTNNKN	5.59002	1.43e-10
COUPTF.M01036	23: NNNNNTGACCYTTGNMCNYNGMN	5.49364	3.13e-44
CREB.M00039	8: TGACGTMA	5.42561	9.02e-14
LXR.M00965	17: YGAMCTNNASTRACCYN	5.30054	8.18e-26
USF.M00796	12: NRCCACGTGASN	5.24064	6.22e-09
E2.M00107	16: NNACCRNNANCGGTRN	5.24064	3.07e-08
NF-Y.M00185	11: TRRCCAATSRN	5.12419	3.32e-19
Macho-1	9: TGGGGGKTC	5.04454	8.24e-100
Hen-1	12: GCGCAGCTGCGT	5.01605	2.63e-10
GCM.M00270	13: NNACCCGCATNNN	4.99109	1.2e-14
MYB.M00773	11: NNNGNCAGTTN	4.89127	1.07e-08
ATF.M00338	12: NTGACGTCANYS	4.85951	5.27e-08
MyoD.M00929	18: CNGNRNCAGGTGNNGNAN	4.75689	6.26e-09
YY1.M00069	20: NNNCGGCCATCTTGNCTSNW	4.71658	2.16e-09
MZF1.M00083	8: NGNGGGGA	4.53229	8.25e-97
Max.M00119	14: NNANCACGTGNTNN	4.49198	2.77e-23
Zic1.M00448	9: KGGGTGGTC	4.4652	0
p50	11: GGGGATTCCCC	4.41711	1.7e-08
NF-1.M00193	18: NNTTGGCNNNNNNCCNNN	4.41317	5.03e-11
Pax-2.M00098	19: NNNNGTCANGNRTKANNNN	4.29733	4.8e-11
USF	7: CACGTGG	4.29477	1.59e-40
SP1.DFCI	8: CCCTGCCC	4.17835	5.81e-35
Myf	12: CAGCAGCTGCTG	4.13429	1.79e-09
Staf	20: GATTTCCCATMATGCCTTGC	4.12701	1.51e-08
CRE-BP1c-Jun.M00041	8: TGACGTYA	4.11189	3.73e-07
c-MYB_1	8: GGCCGTTG	4.09723	4.24e-11
CF1.M00111	9: GGGGTCAYS	4.05277	2.46e-14
TTF-1.M00794	12: NNNNCAAGNRNN	4.03127	6.12e-07
CF1.M00112	9: GGGGTCACG	3.988	1.68e-18
AP-2rep.M00468	7: CAGTGGG	3.98519	2.69e-76
Max	10: RACCACGTGA	3.97566	2.25e-25
c-MycMax.M00118	14: NNACCACGTGGTNN	3.89305	5.59e-07
Pax-4.M00378	12: NNNNNYCACCCB	3.8761	2.86e-22
VDR.M00444	15: GGGKNARNRRGGWSA	3.84793	1.19e-29
NF-kappaB.M00051	10: GGGGATYCCC	3.82795	2.74e-10
AP-1.M00517	13: NNNTGAGTCAKCN	3.7512	1.88e-08
c-Ets-1(p54).M00074	13: NNACMGGAWRTNN	3.69928	1.56e-07
VDR.M00966	21: RRTGNMCYTNNTGAMCCNYNT	3.69928	1.56e-07
E47.M00002	15: VSNGCAGGTGKNCNN	3.62478	1.02e-09
p300.M00033	14: NNNGGGAGTNNNNS	3.59358	2.4e-20
Zic3.M00450	9: NGGGKGGTC	3.55452	1.19e-16
USF.M00217	8: NCACGTGN	3.51001	5.3e-29
GATA-1.M00075	10: SNNGATNNNN	3.48804	8.56e-21
Zic2.M00449	9: KGGGTGGTC	3.37355	0
n-MYC	6: CACGTG	3.35667	2.68e-47
ARNT	6: CACGTG	3.35667	2.68e-47
STAT1.M00492	8: CANTTCCS	3.35253	9.54e-83
Bach2.M00490	11: SRTGAGTCANC	3.19955	1.88e-06
NF-kappaB.M00774	16: NNNNKGGRAANTCCCN	3.17521	4.57e-19
Lmo2.M00277	12: CNNCAGGTGBNN	3.16645	7.76e-26
Myc-Max	11: GASCACGTGGT	3.14439	4.89e-07
HNF-4.M00134	19: NNNRGGNCAAAGKTCANNN	3.10695	2.18e-08
Myc.M00799	7: CACGTGS	3.09979	1.83e-24
MZF_1-4	6: TGGGGA	3.04959	1.17e-273
SPI-1	6: CGGAAG	3.04522	8.95e-161
HEN1.M00068	22: NNNGGNCNCAGCTGCGNCCCNN	2.97889	1.07e-05
VDR.M00961	12: CNSNNTGAACCN	2.97669	4.63e-07
MYB.M00913	9: NAACNGNCN	2.95029	2.54e-13
ZID.M00085	13: NGGCTCYATCAYC	2.92373	1.63e-05
c-Ets-1.M00339	15: RCAGGAAGTGNNTNS	2.88235	6.25e-14
HNF4	13: AGGCCAAAGGTCA	2.87096	3.5e-06
c-Myb.M00183	10: NNNAACTGNC	2.82995	1.96e-07
ETS.M00771	12: ANNCACTTCCTG	2.82539	5.28e-06
Pax-8.M00717	15: NNNTNNNGNGTGANN	2.80445	1.12e-08
HNF4.M01033	6: NGGNCA	2.76723	1.64e-138
NF-1.M00806	17: NTGGNNNNNNGCCAANN	2.73678	2.25e-11
E2A.M00804	14: NCACCTGYYNCNKN	2.71561	1.09e-36
Ebox.M01034	10: NCACSTGNCN	2.71068	1.18e-06
RFX1.M00280	17: NNGTNRCNWRGYAACNN	2.70767	9.91e-06
STAT6.M00500	8: NNYTTCCY	2.44793	3.35e-22
NF-kappaB	10: GGGAATTTCC	2.38033	4.83e-15
PPAR.M00763	13: TGACCTTTGNCCY	2.35829	2.01e-05
NF-kappaB.M00054	10: GGGAMTTYCC	2.30995	1.74e-13
RFX1.M00281	18: NNGTNRCNATRGYAACNN	2.30944	2.24e-08
Abd-B.M00090	14: NSNTTTATGGCNNN	2.27095	8.79e-05
NF-kappaB.M00194	14: NGGGGAMTTTCCNN	2.21957	5.46e-05
HNF4.M01031	14: NGGNCAAAGKYCAN	2.18661	2.99e-07
EN-1	11: AAGTAGTGSYC	2.14866	3.12e-05
GAGA.M00723	11: ASWGAGMGNRA	2.13975	1.09e-134
Pax-8.M00328	18: NCNNTNNTGCRTGANNNN	2.13933	2.83e-08
c-REL	10: GGGGATTTCC	2.13392	8.72e-17
SREBP-1.M00220	11: NATCACGTGAY	2.11102	8.07e-08
E12.M00693	11: RRCAGGTGNCV	2.10859	4.89e-09
T3R.M00963	9: MNTGWCCTN	2.09626	2.93e-207
ER.M00959	11: NAGGTCANNNY	2.07454	1.57e-33
SREBP.M00776	12: VNNVTCACCCYA	2.07188	4.47e-05
c-Rel.M00053	10: SGGRNTTTCC	2.06767	1.18e-10
